# Supplementary material
Source: publisher site journal article supplement (https://www.kjim.org/upload/media/kjim-2022-072-suppl14.pdf)
Supplement: Supplementary file 1 [file kjim-2022-072-suppl14.pdf]

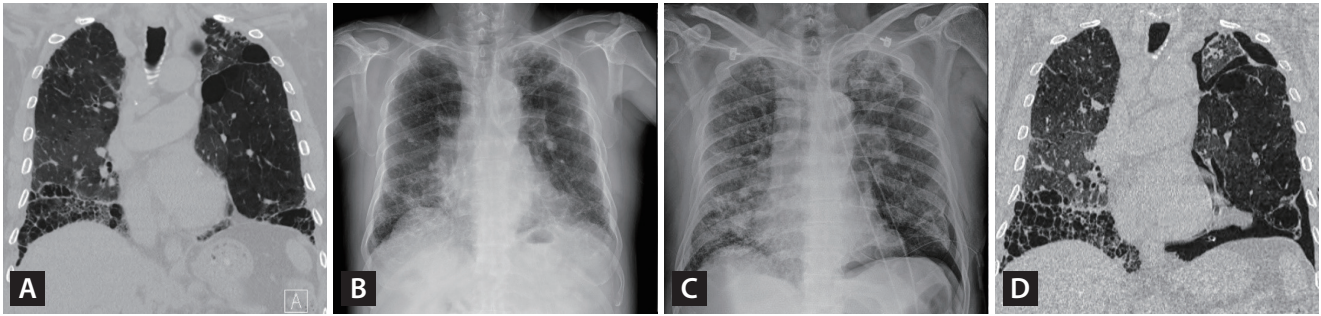

**Supplementary Figure 10.** Radiologic findings of patient #11 before and after coronavirus disease 2019 (COVID-19) vaccination (first dose of BNT162b2-mRNA vaccine). (A) Seven months prior to onset. (B) Three weeks prior to onset. (C, D) COVID-19 vaccine-related pneumonitis (CV-P).
